# Supplementary material
Source: ML conference proceedings conference paper supplement (https://proceedings.neurips.cc/paper_files/paper/2016/hash/7ce3284b743aefde80ffd9aec500e085-Abstract.html)
Supplement: Supplementary file [file 7ce3284b743aefde80ffd9aec500e085-Supplemental.zip]

---

# Robustness of classifiers: from adversarial to random noise (Supplementary material)

---

Alhussein Fawzi\*, Seyed-Mohsen Moosavi-Dezfooli\*, Pascal Frossard

École Polytechnique Fédérale de Lausanne

Lausanne, Switzerland

{alhussein.fawzi, seyed.moosavi, pascal.frossard} at epfl.ch

## A.1 Proof of Theorem 1 (affine classifiers)

**Lemma 1** ([1]). *Let  $Y$  be a point chosen uniformly at random from the surface of the  $d$ -dimensional sphere  $\mathbb{S}^{d-1}$ . Let the vector  $Z$  be the projection of  $Y$  onto its first  $m$  coordinates, with  $m < d$ . Then,*

1. *If  $\beta < 1$ , then*

$$\mathbb{P}\left(\|Z\|_2^2 \leq \frac{\beta m}{d}\right) \leq \beta^{m/2} \left(1 + \frac{(1-\beta)m}{(d-m)}\right)^{(d-m)/2} \leq \exp\left(\frac{m}{2}(1-\beta + \ln \beta)\right). \quad (\text{A.1})$$

2. *If  $\beta > 1$ , then*

$$\mathbb{P}\left(\|Z\|_2^2 \geq \frac{\beta m}{d}\right) \leq \beta^{m/2} \left(1 + \frac{(1-\beta)m}{(d-m)}\right)^{(d-m)/2} \leq \exp\left(\frac{m}{2}(1-\beta + \ln \beta)\right). \quad (\text{A.2})$$

**Lemma 2.** *Let  $\mathbf{v}$  be a random vector uniformly drawn from the unit sphere  $\mathbb{S}^{d-1}$ , and  $\mathbf{P}_m$  be the projection matrix onto the first  $m$  coordinates. Then,*

$$\mathbb{P}\left(\beta_1(\delta, m) \frac{m}{d} \leq \|\mathbf{P}_m \mathbf{v}\|_2^2 \leq \beta_2(\delta, m) \frac{m}{d}\right) \geq 1 - 2\delta, \quad (\text{A.3})$$

with  $\beta_1(\delta, m) = \max((1/e)\delta^{2/m}, 1 - \sqrt{2(1 - \delta^{2/m})})$ , and  $\beta_2(\delta, m) = 1 + 2\sqrt{\frac{\ln(1/\delta)}{m}} + \frac{2\ln(1/\delta)}{m}$ .

*Proof.* Note first that the upper bound of Lemma 1 can be bounded as follows:

$$\beta^{m/2} \left(1 + \frac{(1-\beta)m}{d-m}\right)^{(d-m)/2} \leq \beta^{m/2} \exp\left(\frac{(1-\beta)m}{2}\right), \quad (\text{A.4})$$

using  $1 + x \leq \exp(x)$ . We find  $\beta$  such that  $\beta^{m/2} \exp\left(\frac{(1-\beta)m}{2}\right) \leq \delta$ , or equivalently,  $\beta \exp(1-\beta) \leq \delta^{2/m}$ . It is easy to see that when  $\beta = \frac{1}{e}\delta^{2/m}$ , the inequality holds. Note however that  $\frac{1}{e}\delta^{2/m}$  does not converge to 1 as  $m \rightarrow \infty$ . We therefore need to derive a tighter bound for this regime. Using the inequality  $\beta \exp(1-\beta) \leq 1 - \frac{1}{2}(1-\beta)^2$  for  $0 \leq \beta \leq 1$ , it follows that the inequality  $\beta \exp(1-\beta) \leq \delta^{2/m}$  holds for  $\beta = 1 - \sqrt{2(1 - \delta^{2/m})}$ . In this case, we have  $1 - \sqrt{2(1 - \delta^{2/m})} \rightarrow 1$ , as  $m \rightarrow \infty$ . We take our lower bound to be the max of both derived bounds (the latter is more appropriate for large  $m$ , whereas the former is tighter for small  $m$ ).

---

\*The first two authors contributed equally to this work.

For  $\beta_2$ , note that the requirement  $\beta \exp(1 - \beta) \leq \delta^{2/m}$  is equivalent to  $-\ln(\beta) + (\beta - 1) \geq \frac{2}{m} \ln(1/\delta)$ . By setting  $\beta = \beta_2(\delta, m)$ , this condition is equivalent to  $2\sqrt{\frac{\ln(1/\delta)}{m}} - \ln(\beta_2(\delta, m)) \geq 0$ , or equivalently,  $2z - \ln(1 + 2z + 2z^2) \geq 0$ , with  $z = \sqrt{\frac{\ln(1/\delta)}{m}}$ . The function  $z \mapsto 2z - \ln(1 + 2z + 2z^2) \geq 0$  is positive on  $\mathbb{R}^+$ . Hence,  $\beta_2(\delta, m)$  satisfies  $\beta \exp(1 - \beta) \leq \delta^{2/m}$ , which concludes the proof.  $\square$

We now prove our main theorem that we recall as follows:

**Theorem 1.** *Let  $\mathcal{S}$  be a random  $m$ -dimensional subspace of  $\mathbb{R}^d$ . The following inequalities hold between the norms of semi-random perturbation  $\mathbf{r}_{\mathcal{S}}^*$  and the worst-case perturbation  $\mathbf{r}^*$ . Let  $\zeta_1(m, \delta) = \frac{1}{\beta_2(m, \delta)}$ , and  $\zeta_2(m, \delta) = \frac{1}{\beta_1(m, \delta)}$ .*

$$\zeta_1(m, \delta) \frac{d}{m} \|\mathbf{r}^*\|_2^2 \leq \|\mathbf{r}_{\mathcal{S}}^*\|_2^2 \leq \zeta_2(m, \delta) \frac{d}{m} \|\mathbf{r}^*\|_2^2, \quad (\text{A.5})$$

with probability exceeding  $1 - 2(L + 1)\delta$ .

*Proof.* For the linear case,  $\mathbf{r}^*$  and  $\mathbf{r}_{\mathcal{S}}^*$  can be computed in closed form. We recall that, for any subspace  $\mathcal{S}$ , we have

$$\mathbf{r}_{\mathcal{S}}^k = \frac{|f_k(\mathbf{x}_0) - f_{\hat{k}(\mathbf{x}_0)}(\mathbf{x}_0)|}{\|\mathbf{P}_{\mathcal{S}}\mathbf{w}_k - \mathbf{P}_{\mathcal{S}}\mathbf{w}_{\hat{k}(\mathbf{x}_0)}\|_2^2} (\mathbf{P}_{\mathcal{S}}\mathbf{w}_k - \mathbf{P}_{\mathcal{S}}\mathbf{w}_{\hat{k}(\mathbf{x}_0)}), \quad (\text{A.6})$$

where  $\mathbf{r}_{\mathcal{S}}^k$  was defined in Eq. (7) in the main paper. In particular, when  $\mathcal{S} = \mathbb{R}^d$ , we have

$$\mathbf{r}^k = \frac{|f_k(\mathbf{x}_0) - f_{\hat{k}(\mathbf{x}_0)}(\mathbf{x}_0)|}{\|\mathbf{w}_k - \mathbf{w}_{\hat{k}(\mathbf{x}_0)}\|_2^2} (\mathbf{w}_k - \mathbf{w}_{\hat{k}(\mathbf{x}_0)}). \quad (\text{A.7})$$

Let  $k \neq \hat{k}(\mathbf{x}_0)$ . Define, for the sake of readability

$$\begin{aligned} f^k &= |f_k(\mathbf{x}_0) - f_{\hat{k}(\mathbf{x}_0)}(\mathbf{x}_0)|, \\ \mathbf{z}^k &= \mathbf{w}_k - \mathbf{w}_{\hat{k}(\mathbf{x}_0)}. \end{aligned}$$

Note that

$$\frac{\|\mathbf{r}^k\|_2^2}{\|\mathbf{r}_{\mathcal{S}}^k\|_2^2} = \frac{\|\mathbf{P}_{\mathcal{S}}\mathbf{z}^k\|_2^2}{\|\mathbf{z}^k\|_2^2}. \quad (\text{A.8})$$

The projection of a fixed vector in  $\mathbb{S}^{d-1}$  onto a random  $m$  dimensional subspace is equivalent (up to a unitary transformation  $\mathbf{U}$ ) to the projection of a random vector uniformly sampled from  $\mathbb{S}^{d-1}$  into a fixed subspace. Let  $\mathbf{P}_m$  be the projection onto the first  $m$  coordinates. We have

$$\|\mathbf{P}_{\mathcal{S}}\mathbf{z}^k\|_2^2 = \|\mathbf{U}^T \mathbf{P}_m \mathbf{U} \mathbf{z}^k\|_2^2 = \|\mathbf{P}_m \mathbf{U} \mathbf{z}^k\|_2^2, \quad (\text{A.9})$$

Hence, we have

$$\frac{\|\mathbf{P}_{\mathcal{S}}\mathbf{z}^k\|_2^2}{\|\mathbf{z}^k\|_2^2} = \|\mathbf{P}_m \mathbf{y}\|_2^2, \quad (\text{A.10})$$

where  $\mathbf{y}$  is a random vector distributed uniformly in the unit sphere  $\mathbb{S}^{d-1}$ . We apply Lemma 2, and obtain

$$\mathbb{P}\left(\beta_1(m, \delta) \frac{m}{d} \leq \|\mathbf{P}_m \mathbf{y}\|_2^2 \leq \beta_2(m, \delta) \frac{m}{d}\right) \geq 1 - 2\delta. \quad (\text{A.11})$$

Hence,

$$\mathbb{P}\left\{\frac{1}{\beta_2(m, \delta)} \frac{d}{m} \leq \frac{\|\mathbf{r}_{\mathcal{S}}^k\|_2^2}{\|\mathbf{r}^k\|_2^2} \leq \frac{1}{\beta_1(m, \delta)} \frac{d}{m}\right\} \geq 1 - 2\delta. \quad (\text{A.12})$$

Using the multi-class extension in Lemma 3, we conclude that

$$\mathbb{P}\left\{\zeta_1(m, \delta) \frac{d}{m} \leq \frac{\|\mathbf{r}_{\mathcal{S}}^*\|_2^2}{\|\mathbf{r}^*\|_2^2} \leq \zeta_2(m, \delta) \frac{d}{m}\right\} \geq 1 - 2(L + 1)\delta. \quad (\text{A.13})$$

$\square$

**Lemma 3** (Binary case to multiclass). *Assume that, for all  $k \in \{1, \dots, L\} \setminus \{\hat{k}(\mathbf{x}_0)\}$*

$$\mathbb{P} \left( l \leq \frac{\|\mathbf{r}_{\mathcal{S}}^k\|_2}{\|\mathbf{r}^k\|_2} \leq u \right) \geq 1 - \delta. \quad (\text{A.14})$$

*Then, we have*

$$\mathbb{P} \left( l \leq \frac{\|\mathbf{r}_{\mathcal{S}}^*\|_2}{\|\mathbf{r}^*\|_2} \leq u \right) \geq 1 - (L + 1)\delta. \quad (\text{A.15})$$

*Proof.* Let  $p := \arg \min_i \|\mathbf{r}^i\|_2$ . Note that we have  $\mathbb{P} \left( \frac{\|\mathbf{r}_{\mathcal{S}}^*\|_2}{\|\mathbf{r}^*\|_2} \geq u \right) \leq \mathbb{P} \left( \frac{\|\mathbf{r}_{\mathcal{S}}^p\|_2}{\|\mathbf{r}^p\|_2} \geq u \right) \leq \delta$ . Moreover, we use a union bound to bound the the other bad event probability:

$$\mathbb{P} \left( \frac{\|\mathbf{r}_{\mathcal{S}}^*\|_2}{\|\mathbf{r}^*\|_2} \leq l \right) \leq \mathbb{P} \left( \bigcup_k \left\{ \frac{\|\mathbf{r}_{\mathcal{S}}^k\|_2}{\|\mathbf{r}^k\|_2} \leq l \right\} \right) \leq L\delta, \quad (\text{A.16})$$

$$(\text{A.17})$$

We conclude by using the fact that

$$\mathbb{P} \left( l \leq \frac{\|\mathbf{r}_{\mathcal{S}}^*\|_2}{\|\mathbf{r}^*\|_2} \leq u \right) = 1 - \mathbb{P} \left( \frac{\|\mathbf{r}_{\mathcal{S}}^*\|_2}{\|\mathbf{r}^*\|_2} \leq l \right) - \mathbb{P} \left( \frac{\|\mathbf{r}_{\mathcal{S}}^*\|_2}{\|\mathbf{r}^*\|_2} \geq u \right). \quad (\text{A.18})$$

□

## A.2 Proof of Theorem 2 and Corollary 1 (nonlinear classifiers)

First, we present an important geometric lemma and then use it to bound  $\|\mathbf{r}_{\mathcal{S}}^*\|_2$ . For the sake of the general readability of the section, some auxiliary results are given in Section A.3.

In the following result, we show that, when the curvature of a planar curve is constant and sufficiently small, the distance between a point  $\mathbf{x}$  and the curve at a specific direction  $\theta$  is well approximated by the distance between  $\mathbf{x}$  and a straight line (see Fig. 1 for an illustration).

**Lemma 4.** *Let  $\gamma$  be a planar curve of constant curvature  $\kappa$ . We denote by  $r$  the distance between a point  $\mathbf{x}$  and the curve  $\gamma$ . Denote moreover by  $\mathcal{T}$  the tangent to  $\gamma$  at the closest point to  $\mathbf{x}$  (see Fig. 1). Let  $\theta$  be the angle between  $\mathbf{u}$  and  $\mathbf{v}$  as depicted in Fig. 1. We assume that  $r\kappa < 1$ . We have*

$$-C_1 r \kappa \tan^2(\theta) \leq \frac{\|\mathbf{x}_{\gamma} - \mathbf{x}\|_2}{\|\mathbf{u}\|_2} - 1 \quad (\text{A.19})$$

Moreover, if

$$\tan^2(\theta) \leq \frac{0.2}{r\kappa},$$

then, the following upper bound holds

$$\frac{\|\mathbf{x}_{\gamma} - \mathbf{x}\|_2}{\|\mathbf{u}\|_2} - 1 \leq C_2 r \kappa \tan^2(\theta). \quad (\text{A.20})$$

We can set  $C_1 = 0.625$  and  $C_2 = 2.25$ .

*Proof of upper bound.* We consider two distinct cases for the curve  $\gamma$ . In the case where  $\gamma$  is concave-shaped (Fig. 1, right figure), we have

$$\frac{\|\mathbf{x}_{\gamma} - \mathbf{x}\|_2}{\|\mathbf{u}\|_2} \leq 1,$$

and the upper bound in Eq. (A.20) directly holds. We therefore focus on the case where  $\gamma$  is convex-shaped as illustrated in the left figure of Fig. 1. Define  $R := 1/\kappa$ , one can write using simple geometric inspection

$$R^2 = \sin(\theta)r'^2 + (R + r - r' \cos(\theta))^2, \quad (\text{A.21})$$

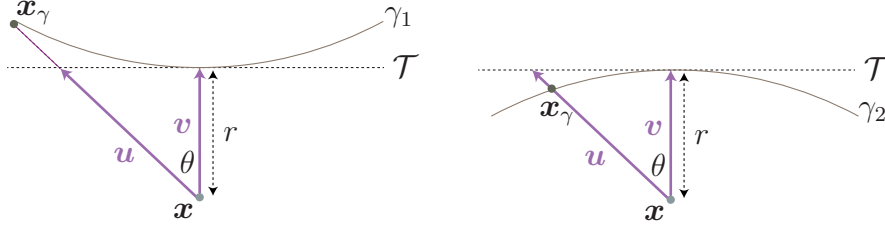

Figure 1: Bounding  $\|\mathbf{x}_\gamma - \mathbf{x}\|_2$  in terms of  $\kappa$ .

where  $r' = \|\mathbf{x}_\gamma - \mathbf{x}\|_2$ . The discriminant of the second order equation (with variable  $r'$ ) is equal to

$$\Delta = 4 \left( (R + r)^2 \cos^2(\theta) - (2rR + r^2) \right).$$

We have  $\Delta \geq 0$  as  $\theta$  satisfies the two assumptions  $\tan^2(\theta) \leq 0.2R/r$  and  $r/R < 1$ . The smallest solution of this second order equation is given as follows

$$r' = (R + r) \cos(\theta) - \sqrt{(R + r)^2 \cos^2(\theta) - 2Rr - r^2}. \quad (\text{A.22})$$

Using some simple algebraic manipulations, we obtain

$$r' = \frac{r}{\cos(\theta)} \left( \left( \frac{R}{r} + 1 \right) \cos^2(\theta) - \frac{R}{r} \cos^2(\theta) \sqrt{1 - \tan^2(\theta) \frac{2Rr + r^2}{R^2}} \right). \quad (\text{A.23})$$

Using the inequality in Lemma 7 together with the two assumptions, we get

$$\begin{aligned} r' \leq \frac{r}{\cos(\theta)} & \left( \cos^2(\theta) + \frac{R}{r} \cos^2(\theta) \tan^2(\theta) \left( \frac{2Rr + r^2}{2R^2} \right) \right. \\ & \left. + \frac{R}{r} \cos^2(\theta) \tan^4(\theta) \left( \frac{2Rr + r^2}{2R^2} \right)^2 \right). \end{aligned} \quad (\text{A.24})$$

With simple trigonometric identities, the above expression can be simplified to

$$r' \leq \frac{r}{\cos(\theta)} \left( 1 + \frac{r}{R} \left( \frac{\sin^2(\theta)}{2} + \frac{\sin^4(\theta)}{\cos^2(\theta)} \left( 1 + \frac{r}{2R} \right)^2 \right) \right). \quad (\text{A.25})$$

We expand this quantity, and obtain

$$r' \leq \frac{r}{\cos(\theta)} \left( 1 + \left( \frac{\sin^2(\theta)}{2} + \frac{\sin^4(\theta)}{\cos^2(\theta)} \right) \frac{r}{R} + \frac{\sin^4(\theta)}{\cos^2(\theta)} \frac{r^2}{R^2} + \frac{\sin^4(\theta)}{4 \cos^2(\theta)} \frac{r^3}{R^3} \right). \quad (\text{A.26})$$

Since  $\sin^2(\theta) \tan^2(\theta) = \tan^2(\theta) - \sin^2(\theta)$ , we have

$$r' \leq \frac{r}{\cos(\theta)} \left( 1 + \tan^2(\theta) \left( \frac{r}{R} + \frac{r^2}{R^2} + \frac{r^3}{4R^3} \right) \right). \quad (\text{A.27})$$

According to the assumptions  $r/R < 1$ , therefore

$$r' \leq \frac{r}{\cos(\theta)} \left( 1 + 2.25 \tan^2(\theta) \frac{r}{R} \right). \quad (\text{A.28})$$

Since  $r/\cos(\theta) = \|\mathbf{u}\|_2$ , one can finally conclude on the upper bound

$$\frac{\|\mathbf{x}_\gamma - \mathbf{x}\|_2}{\|\mathbf{u}\|_2} - 1 \leq 2.25 r \kappa \tan^2(\theta). \quad (\text{A.29})$$

□

*Proof of lower bound.* When the curve is convex shaped (Fig. 1 left), we have  $\|\mathbf{x}_\gamma - \mathbf{x}\|_2 \geq \|\mathbf{u}\|_2$ , and the desired lower bound holds. We focus therefore on the case where  $\gamma$  has a concave shape,

and coincides with  $\gamma_2$  (see Fig. 1 right). The following equation holds using simple geometric arguments

$$R^2 = \sin(\theta)r'^2 + (R - r + r' \cos(\theta))^2. \quad (\text{A.30})$$

where  $r' = \|\mathbf{x}_\gamma - \mathbf{x}\|_2$ . Solving this second order equation gives

$$r' = -(R - r) \cos(\theta) + \sqrt{(R - r)^2 \cos^2(\theta) - r^2 + 2Rr}. \quad (\text{A.31})$$

After some algebraic manipulations, we get

$$r' = \frac{r}{\cos(\theta)} \left( -\left(\frac{R}{r} - 1\right) \cos^2(\theta) + \frac{R}{r} \cos^2(\theta) \sqrt{1 + \tan^2(\theta) \frac{2Rr - r^2}{R^2}} \right). \quad (\text{A.32})$$

Using the inequality in Lemma 8, together with the fact that  $r\kappa < 1$ , we obtain

$$\begin{aligned} r' \geq \frac{r}{\cos(\theta)} & \left( \cos^2(\theta) + \frac{R}{r} \cos^2(\theta) \tan^2(\theta) \left( \frac{2Rr - r^2}{2R^2} \right) \right. \\ & \left. - \frac{R \cos^2(\theta) \tan^4(\theta)}{2} \left( \frac{2Rr - r^2}{2R^2} \right)^2 \right). \end{aligned} \quad (\text{A.33})$$

Using simple trigonometric identities, the above expression is simplified to

$$r' \geq \frac{r}{\cos(\theta)} \left( 1 + \frac{r}{R} \left( -\frac{\sin^2(\theta)}{2} - \frac{\sin^4(\theta)}{2 \cos^2(\theta)} \left( 1 - \frac{r}{2R} \right)^2 \right) \right). \quad (\text{A.34})$$

When expanding it, we obtain

$$r' \geq \frac{r}{\cos(\theta)} \left( 1 - \left( \frac{\sin^2(\theta)}{2} + \frac{\sin^4(\theta)}{2 \cos^2(\theta)} \right) \frac{r}{R} + \frac{\sin^4(\theta)}{2 \cos^2(\theta)} \frac{r^2}{R^2} - \frac{\sin^4(\theta)}{8 \cos^2(\theta)} \frac{r^3}{R^3} \right). \quad (\text{A.35})$$

Since  $\sin^2(\theta) \tan^2(\theta) = \tan^2(\theta) - \sin^2(\theta)$ , we have

$$r' \geq \frac{r}{\cos(\theta)} \left( 1 - \tan^2(\theta) \left( \frac{r}{2R} + \frac{r^3}{8R^3} \right) \right). \quad (\text{A.36})$$

Using again the assumption  $r/R < 1$ , we obtain

$$r' \geq \frac{r}{\cos(\theta)} \left( 1 - 0.625 \tan^2(\theta) \frac{r}{R} \right). \quad (\text{A.37})$$

Since  $r/\cos(\theta) = \|\mathbf{u}\|_2$ , one can rewrite it as

$$\frac{\|\mathbf{x}_\gamma - \mathbf{x}\|_2}{\|\mathbf{u}\|_2} - 1 \geq -0.625 r \kappa \tan^2(\theta), \quad (\text{A.38})$$

which completes the proof.  $\square$

We now use the previous lemma to bound the semi-random robustness of the classifier, i.e.  $\|\mathbf{r}_S^k\|_2$ , to the worst-case robustness  $\|\mathbf{r}^k\|_2$  in the case where the curvature is sufficiently small.

**Theorem 2.** *Let  $S$  be a random  $m$ -dimensional subspace of  $\mathbb{R}^d$ . Define  $\alpha := \sqrt{m/d}$ , and let  $\kappa := \kappa(\mathcal{B}_k)$ . Assuming that  $\kappa \leq \frac{C\alpha^2}{\zeta_2(m, \delta) \|\mathbf{r}^k\|_2}$ , the following inequalities hold between  $\|\mathbf{r}_S^k\|_2$  and the worst-case perturbation  $\|\mathbf{r}^k\|_2$*

$$\frac{\zeta_1(m, \delta)}{\alpha^2} \left( 1 - \frac{C_1 \|\mathbf{r}^k\|_2 \kappa \zeta_2(m, \delta)}{\alpha^2} \right)^2 \leq \frac{\|\mathbf{r}_S^k\|_2^2}{\|\mathbf{r}^k\|_2^2} \leq \frac{\zeta_2(m, \delta)}{\alpha^2} \left( 1 + \frac{C_2 \|\mathbf{r}^k\|_2 \kappa \zeta_2(m, \delta)}{\alpha^2} \right)^2 \quad (\text{A.39})$$

with probability larger than  $1 - 4\delta$ . The constants can be taken  $C = 0.2$ ,  $C_1 = 0.625$ ,  $C_2 = 2.25$ .

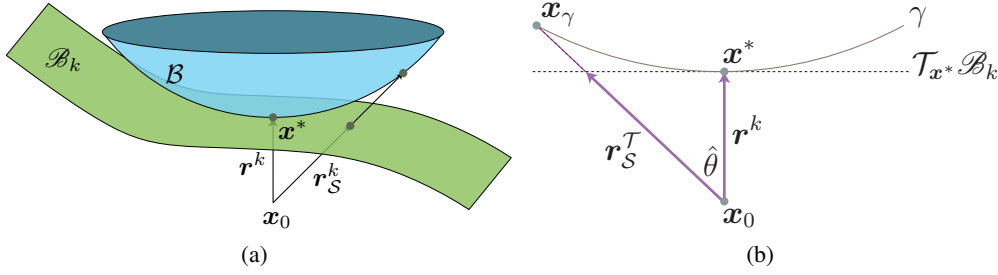

Figure 2: Left: To prove the upper bound, we consider a ball  $\mathcal{B}$  included in  $\mathcal{R}_k$  that intersects with the boundary at  $\mathbf{x}^*$ . Upper bounds on  $\|\mathbf{r}_S^k\|_2$  derived when the boundary is  $\partial\mathcal{B}$  are also valid upper bounds for the real boundary  $\mathcal{B}_k$ . Right: Normal section to the decision boundary  $\mathcal{B}_k = \partial\mathcal{B}$  along the normal plane  $\mathcal{U} = \text{span}(\mathbf{r}_S^T, \mathbf{r}^k)$ . We denote by  $\gamma$  the normal section of boundary  $\mathcal{B}_k$ , along the plane  $\mathcal{U}$ , and by  $\mathcal{T}_{\mathbf{x}^*}\mathcal{B}_k$  the tangent space to the sphere  $\partial\mathcal{B}$  at  $\mathbf{x}^*$ .

*Proof of upper bound.* Denote by  $\mathbf{x}^*$  the point belonging to the boundary  $\mathcal{B}_k$  that is closest to the original data point  $\mathbf{x}_0$ . By definition of the curvature  $\kappa$ , there exists a point  $\mathbf{z}^*$  such that the ball  $\mathcal{B}$  centered at  $\mathbf{z}^*$  and of radius  $1/\kappa = \|\mathbf{z}^* - \mathbf{x}^*\|_2$  is inscribed in the region  $\mathcal{R}_k = \{x \in \mathbb{R}^d : f_k(x) > f_{\hat{k}(\mathbf{x}_0)}(x)\}$  (see Fig. 2 (a)).<sup>2</sup>

Observe that the worst-case perturbation along any subspace  $\mathcal{S}$  that reaches the ball  $\mathcal{B}$  is larger than the perturbation along  $\mathcal{S}$  that reaches the region  $\mathcal{R}_k$ , as  $\mathcal{B} \subseteq \mathcal{R}_k$ . Therefore, any upper bound derived when the boundary is the sphere of radius  $1/\kappa$ ; i.e.,  $\mathcal{B}_k = \partial\mathcal{B}$  is also a valid upper bound for boundary  $\mathcal{B}_k$  (see Fig. 2 (a)). It is therefore sufficient to derive an upper bound in the worst case scenario where the boundary  $\mathcal{B}_k = \partial\mathcal{B}$ , and we consider this case for the remainder of the proof of the upper bound.

We now consider the linear classifier whose boundary is tangent to  $\mathcal{B}_k$  at  $\mathbf{x}^*$ . For the random subspace  $\mathcal{S}$ , we denote by  $\mathbf{r}_S^T$  the worst-case subspace perturbation for this linear classifier. We then focus on the intersection between the boundary  $\mathcal{B}_k$  and the two-dimensional plane  $\mathcal{U}$  spanned by the vectors  $\mathbf{r}^k$  and  $\mathbf{r}_S^T$ . This *normal* section of the boundary cuts the ball  $\mathcal{B}$  through its center as the tangent spaces of the decision boundary and the ball coincide. See Fig. 2 for a clarifying figure of this two-dimensional cross-section. We define the angle  $\hat{\theta}$  as denoted in Fig. 2, such that  $\cos(\hat{\theta}) = \frac{\|\mathbf{r}^k\|_2}{\|\mathbf{r}_S^T\|_2}$ .

We apply our result on linear classifiers in Theorem 1 for the tangent classifier. We have

$$\frac{1}{\cos(\hat{\theta})^2} = \frac{\|\mathbf{r}_S^T\|_2^2}{\|\mathbf{r}^k\|_2^2} \leq \frac{1}{\alpha^2} \zeta_2(m, \delta), \quad (\text{A.40})$$

with probability exceeding  $1 - 2\delta$ . Hence, using  $\tan^2(\hat{\theta}) \leq (\cos^2(\hat{\theta}))^{-1}$  and the assumption of the theorem, we deduce that

$$\tan^2(\hat{\theta}) \leq \frac{1}{\alpha^2} \zeta_2(m, \delta) \leq \frac{0.2}{\kappa \|\mathbf{r}^k\|_2},$$

with probability exceeding  $1 - 2\delta$ . Note moreover that

$$\|\mathbf{r}^k\|_2 \kappa \leq \frac{0.2\alpha^2}{\zeta_2(m, \delta)} < 1.$$

Hence, the assumptions of Lemma 4 hold with probability larger than  $1 - 2\delta$ . Using the notations of Fig. 2, we therefore obtain from Lemma 4

$$\frac{\|\mathbf{x}_\gamma - \mathbf{x}_0\|_2}{\|\mathbf{r}_S^T\|_2} - 1 \leq C_2 \kappa \|\mathbf{r}^k\|_2 \tan^2(\hat{\theta}) \quad (\text{A.41})$$

<sup>2</sup>For a fixed point  $\mathbf{x}^*$  on the boundary, the maximal radius  $1/\kappa$  might not be achieved. To prove the result in the general case where the supremum is not achieved, one can consider instead a sequence  $(\kappa_n)_n$  converging to  $\kappa$ , such that the balls of radius  $1/\kappa_n$  and intersecting the boundary at  $\mathbf{x}^*$  are included in  $\mathcal{R}_k$ . The same proof and results follow by taking the limit on the bounds derived with ball of radius  $1/\kappa_n$ .

with probability larger than  $1 - 2\delta$ .

Observe that  $\|\mathbf{x}_\gamma - \mathbf{x}_0\|_2 \geq \|\mathbf{r}_S^k\|_2$ , and that  $\tan^2(\hat{\theta}) \leq \frac{\|\mathbf{r}_S^T\|_2^2}{\|\mathbf{r}^k\|_2^2}$ . Hence, we obtain by re-writing Eq. (A.41)

$$\mathbb{P} \left( \frac{\|\mathbf{r}_S^k\|_2^2}{\|\mathbf{r}^k\|_2^2} \leq \left\{ 1 + C_2 \kappa \|\mathbf{r}^k\|_2 \frac{\|\mathbf{r}_S^T\|_2^2}{\|\mathbf{r}^k\|_2^2} \right\}^2 \frac{\|\mathbf{r}_S^T\|_2^2}{\|\mathbf{r}^k\|_2^2} \right) \geq 1 - 2\delta. \quad (\text{A.42})$$

Using the inequality in Eq. (A.40), we obtain

$$\mathbb{P} \left( \frac{\|\mathbf{r}_S^k\|_2^2}{\|\mathbf{r}^k\|_2^2} \leq \left\{ 1 + C_2 \kappa \|\mathbf{r}^k\|_2 \frac{\zeta_2(m, \delta)}{\alpha^2} \right\}^2 \frac{\zeta_2(m, \delta)}{\alpha^2} \right) \geq 1 - 2\delta,$$

which concludes the proof of the upper bound.  $\square$

*Proof of the lower bound.* We now consider the ball  $\mathcal{B}'$  of center  $\mathbf{z}^*$  and radius  $1/\kappa = \|\mathbf{z}^* - \mathbf{x}^*\|_2$  that is included in the region  $\mathcal{R}_{\hat{k}(\mathbf{x}_0)}$ . Since the ball  $\mathcal{B}'$  is, by definition, included in the region  $\mathcal{R}_{\hat{k}(\mathbf{x}_0)}$ , the worst-case scenario for the lower bound on  $\|\mathbf{r}_S^k\|_2$  occurs whenever the decision boundary  $\mathcal{B}_k$  coincides with the ball  $\mathcal{B}'$  (see Fig. 3 (a)). We consider this case in the remainder of the proof.

To derive the lower bound, we consider the cross-section  $\mathcal{U}'$  spanned by the vectors  $\mathbf{r}_S^k$  and  $\mathbf{r}^k$  (Fig. 3 (b)). We have  $\|\mathbf{r}^k\|_2 \kappa < 1$ ; using the lower bound of Lemma 4, we obtain

$$-C_1 \kappa \|\mathbf{r}^k\|_2 \tan^2(\tilde{\theta}) \leq \frac{\|\mathbf{r}_S^k\|_2}{\|\mathbf{x}_T - \mathbf{x}_0\|_2} - 1 \quad (\text{A.43})$$

for any  $\mathcal{S}$ . Observe moreover that

$$\tan^2(\tilde{\theta}) \leq \frac{1}{\cos(\tilde{\theta})^2} = \frac{\|\mathbf{x}_T - \mathbf{x}_0\|_2^2}{\|\mathbf{r}^k\|_2^2}.$$

Hence, the following bound holds:

$$\frac{\|\mathbf{x}_T - \mathbf{x}_0\|_2^2}{\|\mathbf{r}^k\|_2^2} \left( 1 - C_1 \kappa \|\mathbf{r}^k\|_2 \frac{\|\mathbf{x}_T - \mathbf{x}_0\|_2^2}{\|\mathbf{r}^k\|_2^2} \right)^2 \leq \frac{\|\mathbf{r}_S^k\|_2^2}{\|\mathbf{r}^k\|_2^2}.$$

Let  $\mathbf{r}_S^T$  denote the worst-case perturbation belonging to subspace  $\mathcal{S}$  for the *linear* classifier  $\mathcal{T}_{x^*} \mathcal{B}_k$ . It is not hard to see that  $\mathbf{r}_S^T$  is *collinear* to  $\mathbf{r}_S^k$  (see Lemma 6 for a proof). Hence, we have  $\mathbf{r}_S^T = \mathbf{x}_T - \mathbf{x}_0$ . By applying our result on linear classifiers in Theorem 1 for the tangent classifier  $\mathcal{T}_{x^*} \mathcal{B}_k$ , we have:

$$\mathbb{P} \left( \frac{\zeta_1(m, \delta)}{\alpha^2} \leq \frac{\|\mathbf{r}_S^T\|_2^2}{\|\mathbf{r}^k\|_2^2} \leq \frac{\zeta_2(m, \delta)}{\alpha^2} \right) \geq 1 - 2\delta.$$

We therefore conclude that

$$\mathbb{P} \left( \frac{\zeta_1(m, \delta)}{\alpha^2} \left\{ 1 - C_1 \kappa \|\mathbf{r}^k\|_2 \frac{\zeta_2(m, \delta)}{\alpha^2} \right\}^2 \leq \frac{\|\mathbf{r}_S^k\|_2^2}{\|\mathbf{r}^k\|_2^2} \right) \geq 1 - 2\delta,$$

which concludes the proof of the lower bound.  $\square$

The goal is now to extend the previous result, derived for binary classifiers, to the multiclass classification case. To do so, we show the following lemma.

**Lemma 5** (Binary case to multiclass). *Let  $p = \arg \min_i \|\mathbf{r}^i\|_2$ . Define the deterministic set*

$$A = \left\{ k : \|\mathbf{r}^k\|_2 \geq 1.45 \sqrt{\zeta_2(m, \delta)} \sqrt{\frac{d}{m}} \|\mathbf{r}^*\|_2 \right\}. \quad (\text{A.44})$$

*Assume that, for all  $k \in A^c$ , we have*

$$\mathbb{P} \left( l \leq \frac{\|\mathbf{r}_S^k\|_2}{\|\mathbf{r}^k\|_2} \leq u \right) \geq 1 - \delta. \quad (\text{A.45})$$

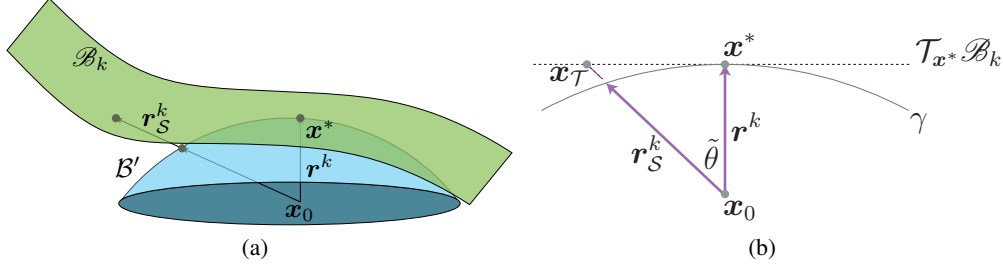

Figure 3: Left: To prove the lower bound, we consider a ball  $\mathcal{B}'$  included in  $\mathcal{R}_{\hat{k}(x_0)}$  that intersects with the boundary at  $x^*$ . Lower bounds on  $\|\mathbf{r}_S^k\|_2$  derived when the boundary is the sphere  $\partial\mathcal{B}'$  are also valid lower bounds for the real boundary  $\mathcal{B}_k$ . Right: Cross section of the problem along the plane  $\mathcal{U}' = \text{span}(\mathbf{r}_S^k, \mathbf{r}^k)$ .  $\gamma$  denotes the normal section of  $\mathcal{B}_k = \mathcal{B}'$  along the plane  $\mathcal{U}'$ .

and that

$$\mathbb{P}\left(\|\mathbf{r}_S^p\|_2 \geq 1.45\sqrt{\zeta_2(m, \delta)}\sqrt{\frac{d}{m}}\|\mathbf{r}^*\|_2\right) \leq t. \quad (\text{A.46})$$

Then, we have

$$\mathbb{P}\left(l \leq \frac{\|\mathbf{r}_S^*\|_2}{\|\mathbf{r}^*\|_2} \leq u\right) \geq 1 - (L+1)\delta - t. \quad (\text{A.47})$$

*Proof.* Note first that

$$\mathbb{P}\left(\frac{\|\mathbf{r}_S^*\|_2}{\|\mathbf{r}^*\|_2} \geq u\right) \leq \mathbb{P}\left(\left\{\frac{\|\mathbf{r}_S^p\|_2}{\|\mathbf{r}^p\|_2} \geq u\right\}\right) \leq \delta. \quad (\text{A.48})$$

We now focus on bounding the other bad event probability  $\mathbb{P}\left(\frac{\|\mathbf{r}_S^*\|_2}{\|\mathbf{r}^*\|_2} \leq l\right)$ . We have

$$\mathbb{P}\left(\frac{\|\mathbf{r}_S^*\|_2}{\|\mathbf{r}^*\|_2} \leq l\right) = \mathbb{P}\left(\min_{k \notin A} \|\mathbf{r}_S^k\|_2 = \|\mathbf{r}_S^*\|_2, \frac{\|\mathbf{r}_S^*\|_2}{\|\mathbf{r}^*\|_2} \leq l\right) + \mathbb{P}\left(\min_{k \in A} \|\mathbf{r}_S^k\|_2 = \|\mathbf{r}_S^*\|_2, \frac{\|\mathbf{r}_S^*\|_2}{\|\mathbf{r}^*\|_2} \leq l\right) \quad (\text{A.49})$$

The first probability can be bounded as follows:

$$\mathbb{P}\left(\min_{k \notin A} \|\mathbf{r}_S^k\|_2 = \|\mathbf{r}_S^*\|_2, \frac{\|\mathbf{r}_S^*\|_2}{\|\mathbf{r}^*\|_2} \leq l\right) \leq \mathbb{P}\left(\bigcup_{k \notin A} \frac{\|\mathbf{r}_S^k\|_2}{\|\mathbf{r}^*\|_2} \leq l\right) \leq L\delta. \quad (\text{A.50})$$

The second probability can also be bounded in the following way

$$\mathbb{P}\left(\min_{k \in A} \|\mathbf{r}_S^k\|_2 = \|\mathbf{r}_S^*\|_2, \frac{\|\mathbf{r}_S^*\|_2}{\|\mathbf{r}^*\|_2} \leq l\right) \leq \mathbb{P}\left(\min_{k \in A} \|\mathbf{r}_S^k\|_2 = \|\mathbf{r}_S^*\|_2\right) = \mathbb{P}(\exists k \in A, \|\mathbf{r}_S^k\|_2 \leq \|\mathbf{r}_S^*\|_2). \quad (\text{A.51})$$

Observe that, for  $k \in A$ , we have  $\|\mathbf{r}_S^k\|_2 \geq \|\mathbf{r}^k\|_2 \geq 1.45\sqrt{\zeta_2(m, \delta)}\sqrt{\frac{d}{m}}\|\mathbf{r}^*\|_2$ . Hence, we conclude that

$$\mathbb{P}\left(\min_{k \in A} \|\mathbf{r}_S^k\|_2 = \|\mathbf{r}_S^*\|_2, \frac{\|\mathbf{r}_S^*\|_2}{\|\mathbf{r}^*\|_2} \leq l\right) \leq \mathbb{P}\left(1.45\sqrt{\zeta_2(m, \delta)}\sqrt{\frac{d}{m}}\|\mathbf{r}^*\|_2 \leq \|\mathbf{r}_S^*\|_2\right) \quad (\text{A.52})$$

$$\leq \mathbb{P}\left(1.45\sqrt{\zeta_2(m, \delta)}\sqrt{\frac{d}{m}}\|\mathbf{r}^*\|_2 \leq \|\mathbf{r}_S^p\|_2\right) \leq t. \quad (\text{A.53})$$

□



**Corollary 1.** Let  $\mathcal{S}$  be a random  $m$ -dimensional subspace of  $\mathbb{R}^d$ . Assume that, for all  $k \notin A$ , we have

$$\kappa(\mathcal{B}_k) \|\mathbf{r}^k\|_2 \leq \frac{0.2}{\zeta_2(m, \delta)} \frac{m}{d} \quad (\text{A.54})$$

Then, we have

$$0.875 \sqrt{\zeta_1(m, \delta)} \sqrt{\frac{d}{m}} \leq \frac{\|\mathbf{r}_{\mathcal{S}}^*\|_2}{\|\mathbf{r}^*\|_2} \leq 1.45 \sqrt{\zeta_2(m, \delta)} \sqrt{\frac{d}{m}} \quad (\text{A.55})$$

with probability larger than  $1 - 4(L + 2)\delta$ .

*Proof.* Using Theorem 2, we have that for all  $k \notin A$ , the result in Eq. (A.39) holds. We simplify the result with the assumption  $\kappa(\mathcal{B}_k) \|\mathbf{r}\|_2 \leq \frac{0.2}{\zeta_2(m, \delta)} \frac{m}{d}$ . Hence, the bounds of Theorem 2 are given as follows

$$\frac{\zeta_1(m, \delta)}{\alpha^2} (1 - 0.2C_1)^2 \leq \frac{\|\mathbf{r}_{\mathcal{S}}^k\|_2^2}{\|\mathbf{r}^k\|_2^2} \leq \frac{\zeta_2(m, \delta)}{\alpha^2} (1 + 0.2C_2)^2, \quad (\text{A.56})$$

which leads to the following bounds:

$$\zeta_1(m, \delta) \frac{d}{m} 0.875^2 \leq \frac{\|\mathbf{r}_{\mathcal{S}}^k\|_2^2}{\|\mathbf{r}^k\|_2^2} \leq \zeta_2(m, \delta) \frac{d}{m} 1.45^2, \quad (\text{A.57})$$

with probability exceeding  $1 - 4\delta$ .

By using Lemma 5, together with the fact that  $t = \delta$ , we obtain

$$\mathbb{P} \left( 0.875 \sqrt{\zeta_1(m, \delta)} \sqrt{\frac{d}{m}} \leq \frac{\|\mathbf{r}_{\mathcal{S}}^*\|_2}{\|\mathbf{r}^*\|_2} \leq 1.45 \sqrt{\zeta_2(m, \delta)} \sqrt{\frac{d}{m}} \right) \geq 1 - 4(L + 2)\delta, \quad (\text{A.58})$$

which concludes the proof.  $\square$

### A.3 Useful results

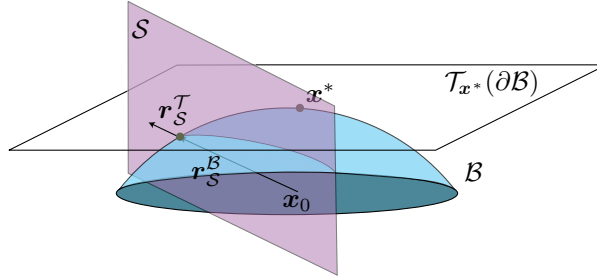

Figure 4: The worst-case perturbation in the subspace  $\mathcal{S}$  when the decision boundary is  $\partial\mathcal{B}$  and  $T_{x^*}(\partial\mathcal{B})$  (denoted respectively by  $\mathbf{r}_{\mathcal{S}}^B$  and  $\mathbf{r}_{\mathcal{S}}^T$ ) are collinear.

**Lemma 6.** Let  $\mathbf{x}_0 \in \mathbb{R}^d$ , and  $\mathbf{x}^*$  denote the closest point to  $\mathbf{x}_0$  on the sphere  $\partial\mathcal{B}$  (see Fig. 4). Let  $T_{x^*}(\partial\mathcal{B})$  be the tangent space to  $\partial\mathcal{B}$  at  $\mathbf{x}^*$ . For an arbitrary subspace  $\mathcal{S}$ , let  $\mathbf{r}_{\mathcal{S}}^T$  and  $\mathbf{r}_{\mathcal{S}}^B$  denote the worst-case perturbations of  $\mathbf{x}_0$  on the subspace  $\mathcal{S}$ , when the decision boundaries are respectively  $T_{x^*}(\partial\mathcal{B})$  and  $\partial\mathcal{B}$ . Then, the two perturbations  $\mathbf{r}_{\mathcal{S}}^T$  and  $\mathbf{r}_{\mathcal{S}}^B$  are collinear.

*Proof.* Assuming the center of the ball  $\mathcal{B}$  is the origin, the points on the sphere  $\partial\mathcal{B}$  satisfy equation:  $\|\mathbf{x}\|_2 = R$ , where  $R$  denotes the radius. Hence, the perturbation  $\mathbf{r}_{\mathcal{S}}^B$  is given by

$$\mathbf{r}_{\mathcal{S}}^B = \underset{\mathbf{r} \in \mathbb{R}^d}{\operatorname{argmin}} \|\mathbf{r}\|_2^2 \text{ such that } \|\mathbf{x}_0 + \mathbf{P}_{\mathcal{S}}\mathbf{r}\|_2^2 = R^2. \quad (\text{A.59})$$

By equating the gradient of Lagrangian of the above constrained optimization problem to zero, we obtain the following necessary optimality condition

$$\mathbf{r} + \lambda \mathbf{P}_{\mathcal{S}}(\mathbf{x}_0 + \mathbf{P}_{\mathcal{S}}\mathbf{r}) = 0.$$

It should further be noted that  $\mathbf{P}_{\mathcal{S}}\mathbf{r}_{\mathcal{S}}^{\mathcal{B}} = \mathbf{r}_{\mathcal{S}}^{\mathcal{B}}$ . Indeed, if  $\mathbf{r}_{\mathcal{S}}^{\mathcal{B}}$  had a component orthogonal to  $\mathcal{S}$ , the projection of  $\mathbf{r}_{\mathcal{S}}^{\mathcal{B}}$  onto  $\mathcal{S}$  would have strictly lower  $\ell_2$  norm, while still satisfying the condition in Eq.(A.59). Hence, the necessary condition of optimality becomes

$$(1 + \lambda)\mathbf{r} + \lambda\mathbf{P}_{\mathcal{S}}\mathbf{x}_0 = 0,$$

from which we conclude that  $\mathbf{r}_{\mathcal{S}}^{\mathcal{B}}$  is collinear to  $\mathbf{P}_{\mathcal{S}}\mathbf{x}_0$ .

It should further be noted that  $\mathbf{r}_{\mathcal{S}}^{\mathcal{T}}$  can be computed in closed form, and is collinear to  $\mathbf{P}_{\mathcal{S}}(\mathbf{x}^* - \mathbf{x}_0)$ , which is itself collinear to  $\mathbf{x}_0$ , as the the center of the ball was assumed to be the origin. This concludes the proof.  $\square$

**Lemma 7.** *If  $x \in [0, 2(\sqrt{2} - 1)]$ ,*

$$\sqrt{1 - x} \geq 1 - \frac{x}{2} - \frac{x^2}{4}. \quad (\text{A.60})$$

**Lemma 8.** *If  $x \geq 0$ ,*

$$\sqrt{1 + x} \geq 1 + \frac{x}{2} - \frac{x^2}{8}. \quad (\text{A.61})$$

## References

- [1] Dasgupta, S. and Gupta, A. (2003). An elementary proof of a theorem of johnson and lindenstrauss. *Random Structures & Algorithms*, 22(1):60–65.
